# Supplementary material
Source: Springer Nature journal article supplement (https://www.springermedizin.de/resource/supplementary/12906_2011_396_MOESM2_ESM.pdf/9519692)

# Hep3B

# SK-Hep1

**pIGF-1R**

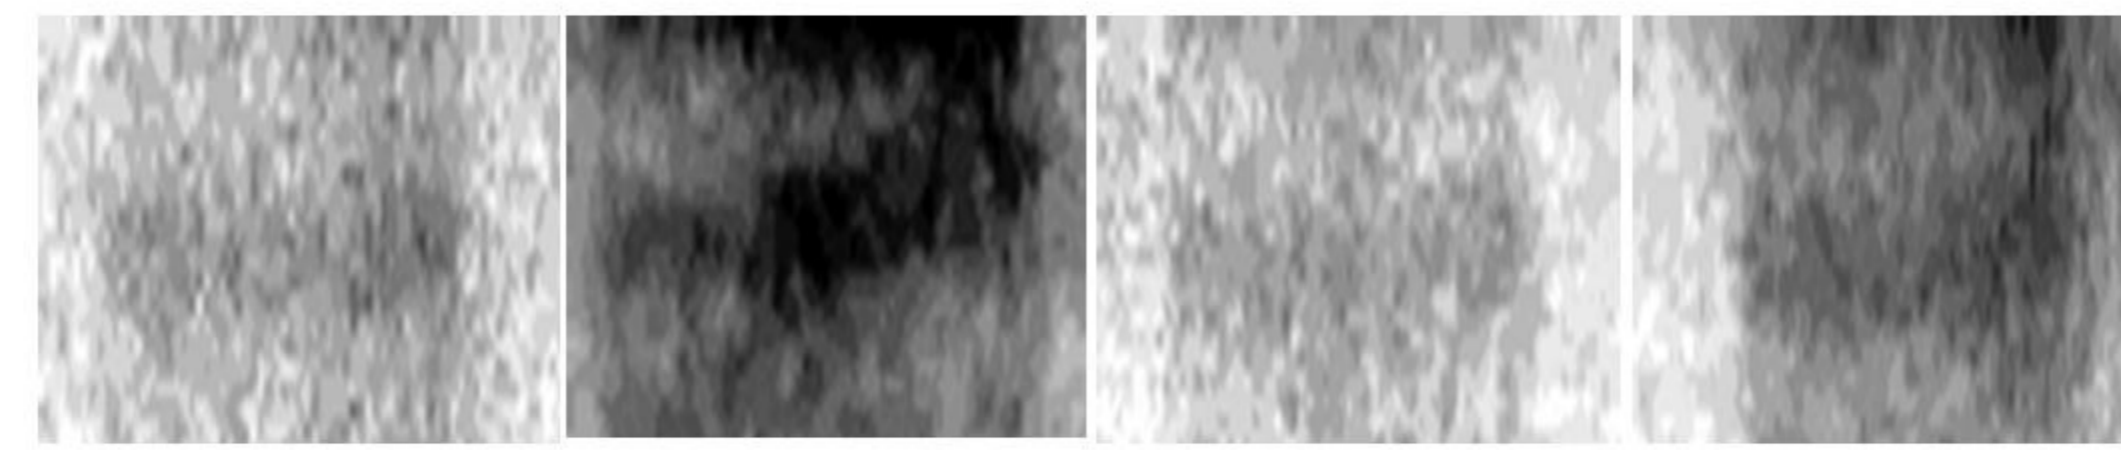

(n-fold)

1.00 4.81 0.73 2.21

**IGF-1R**

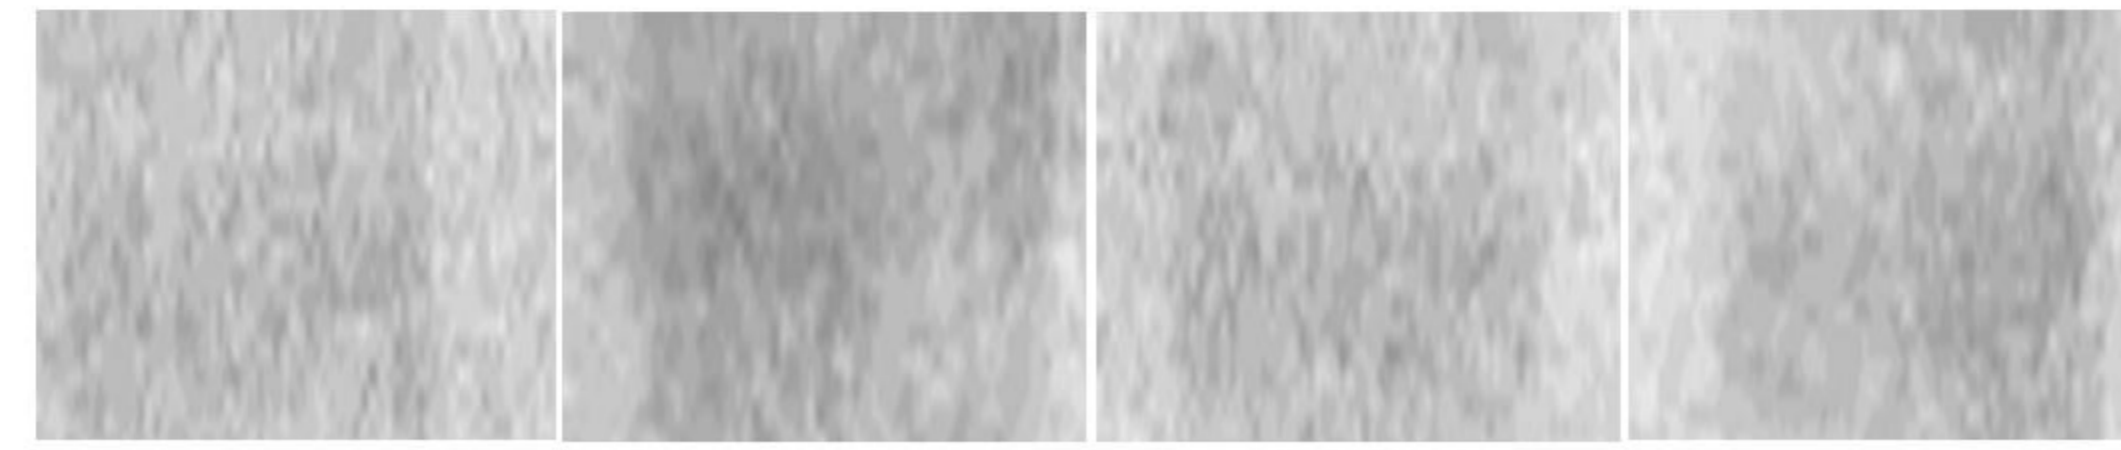

**pAkt**

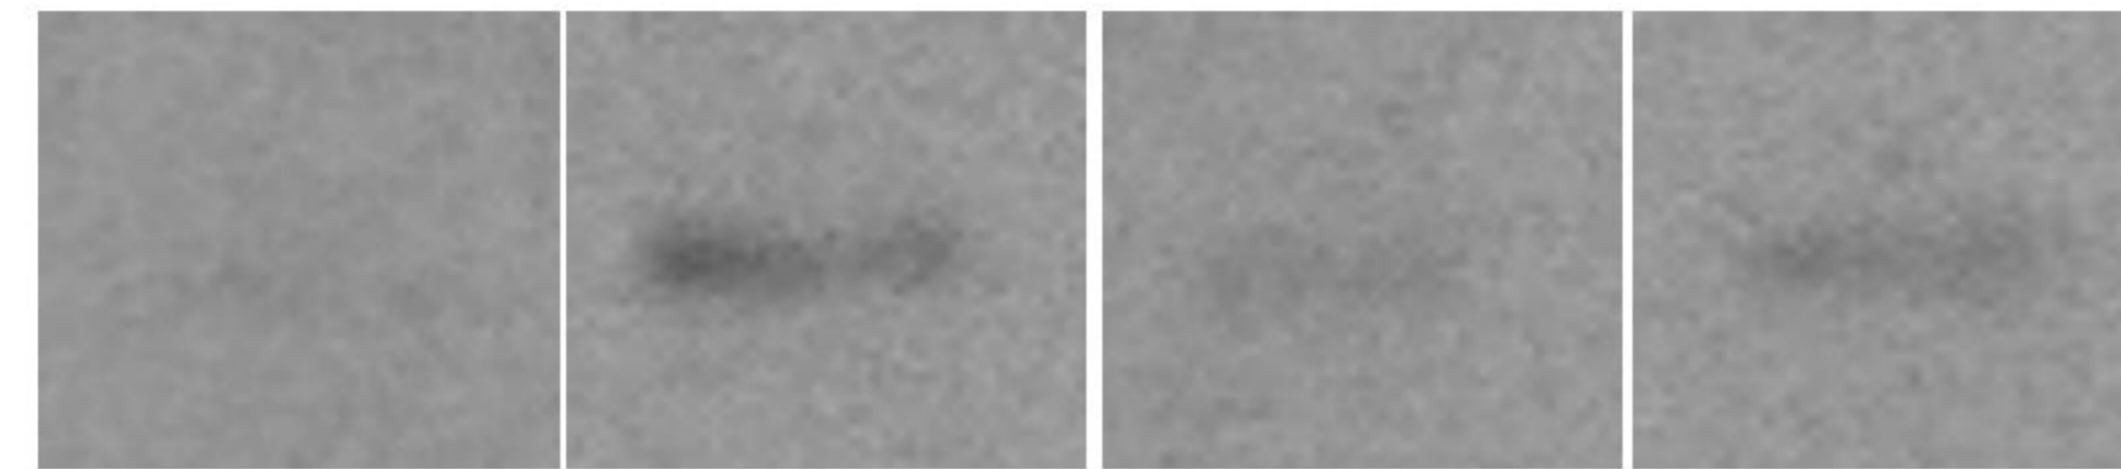

(n-fold)

1.00 2.96 1.02 1.67

**Akt**

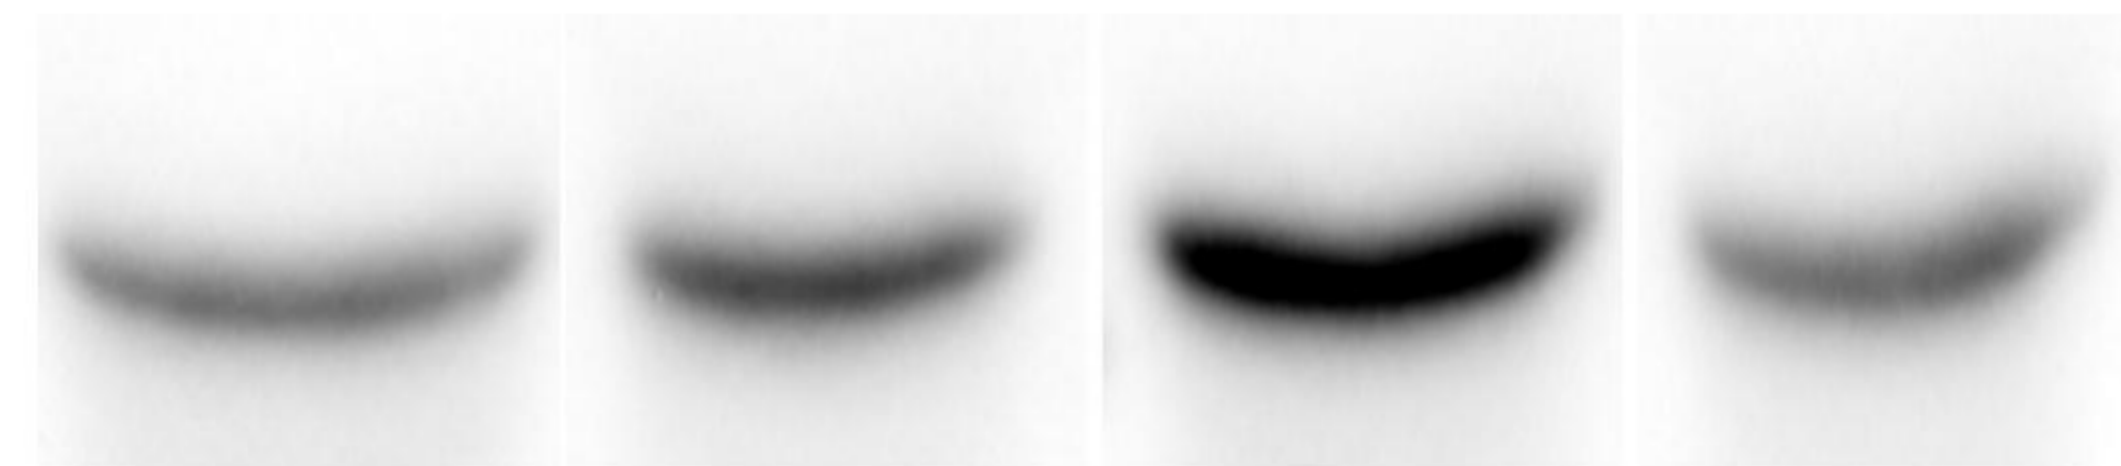

**pStat3**

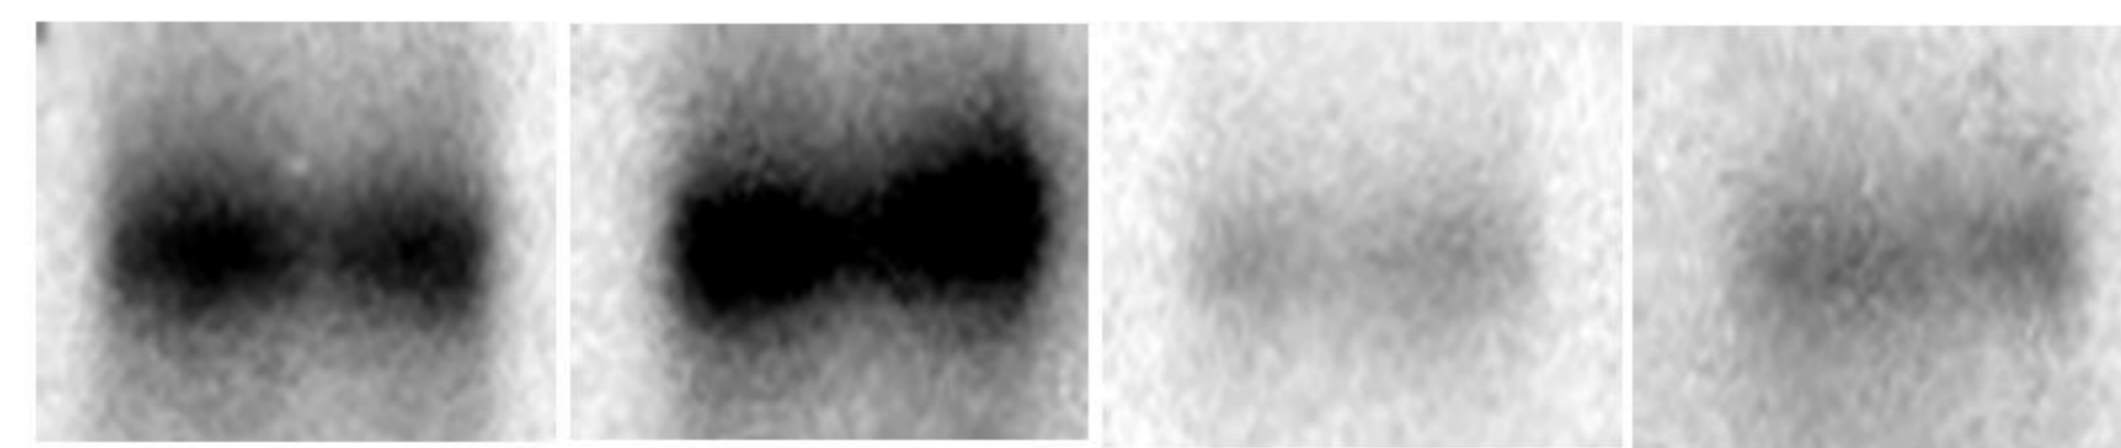

(n-fold)

1.00 2.01 0.20 0.38

**Stat3**

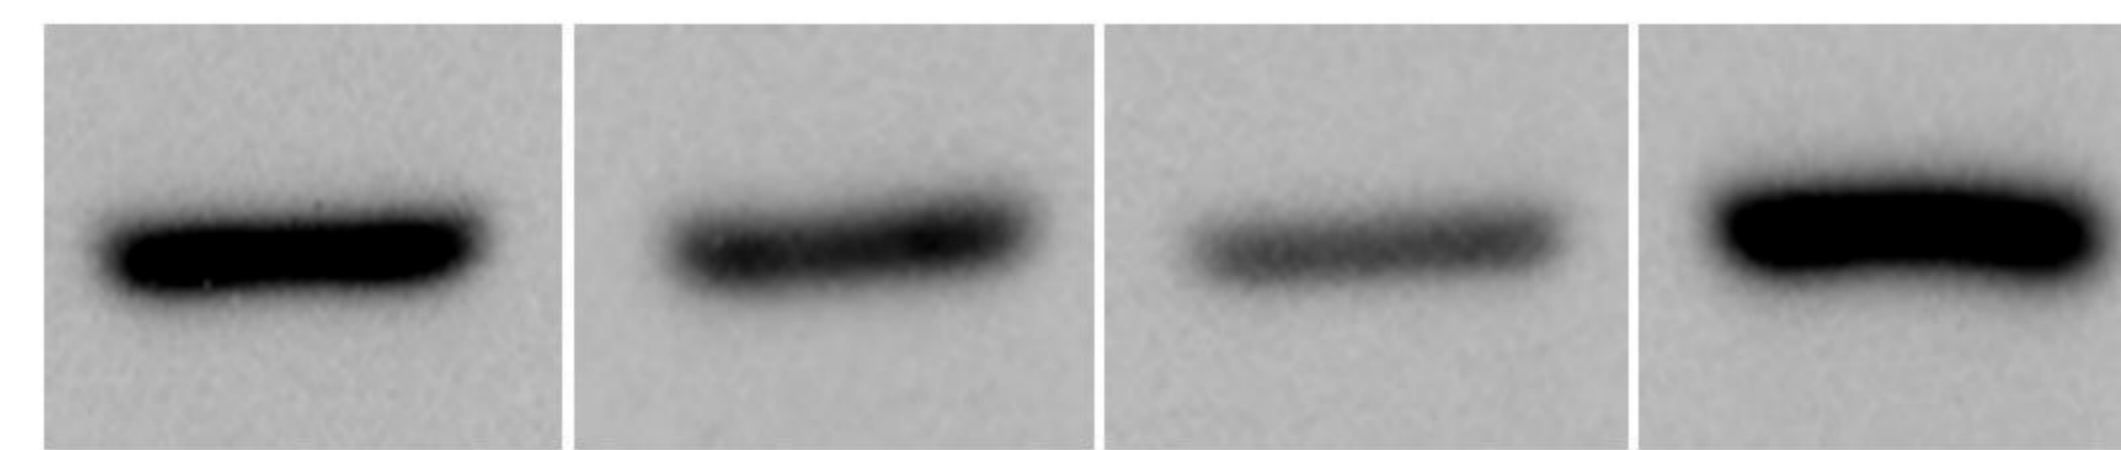

**β-actin**

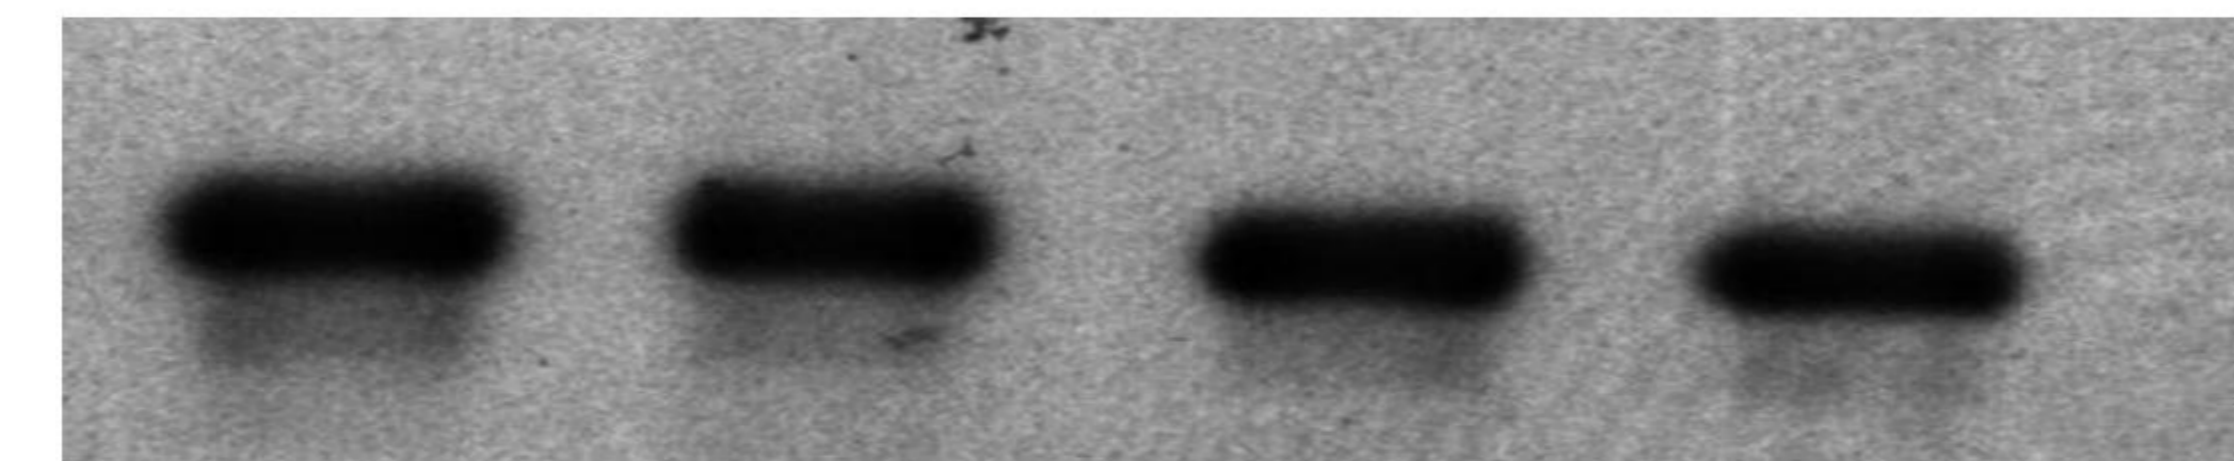

**IGF-1**

- + - +

***L.obtusiloba* extract**

- - + +

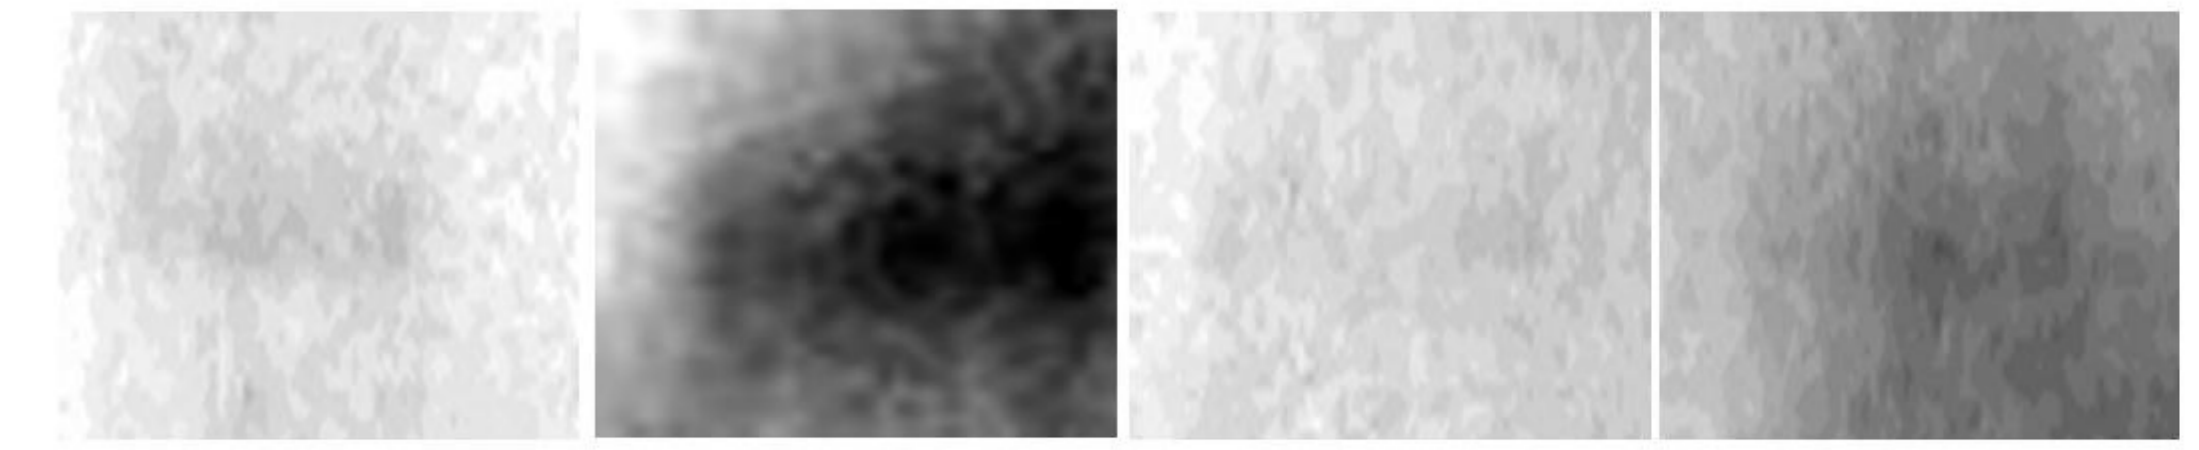

1.00 22.3 0.81 5.02

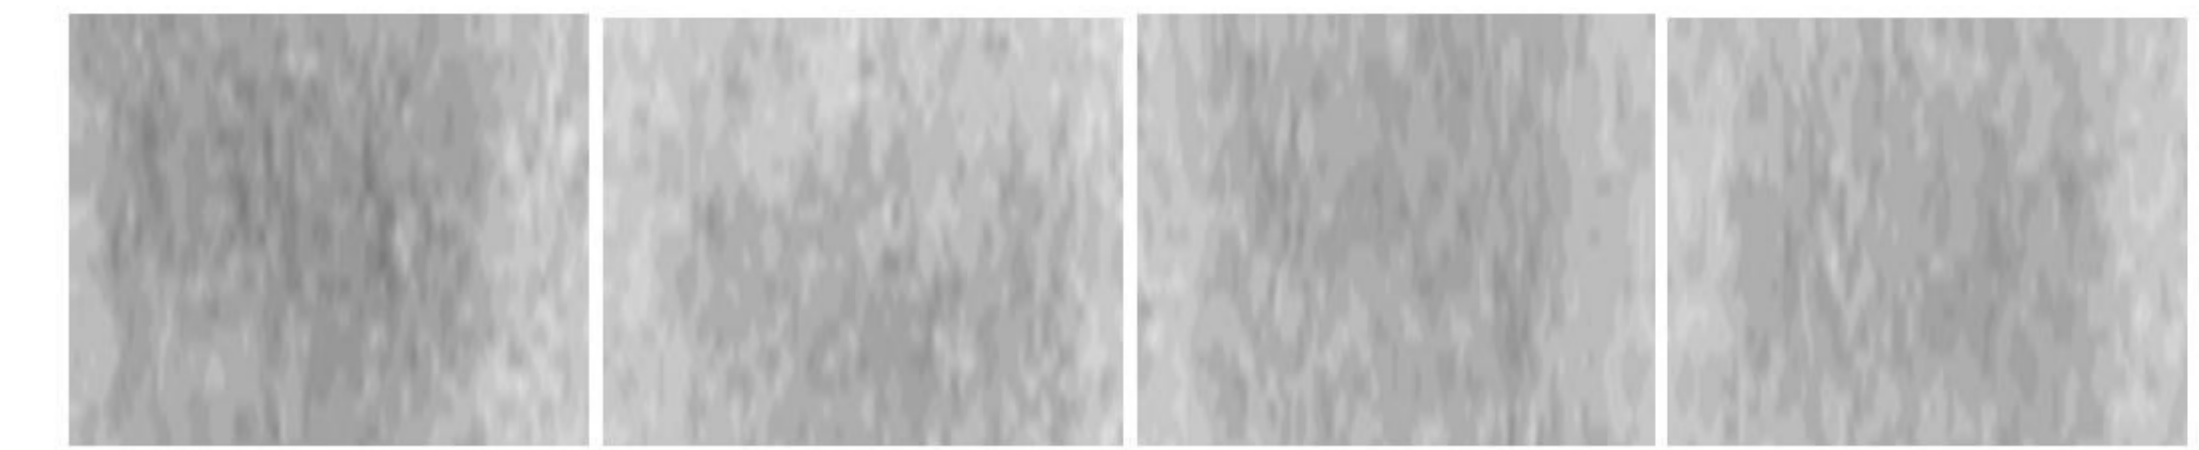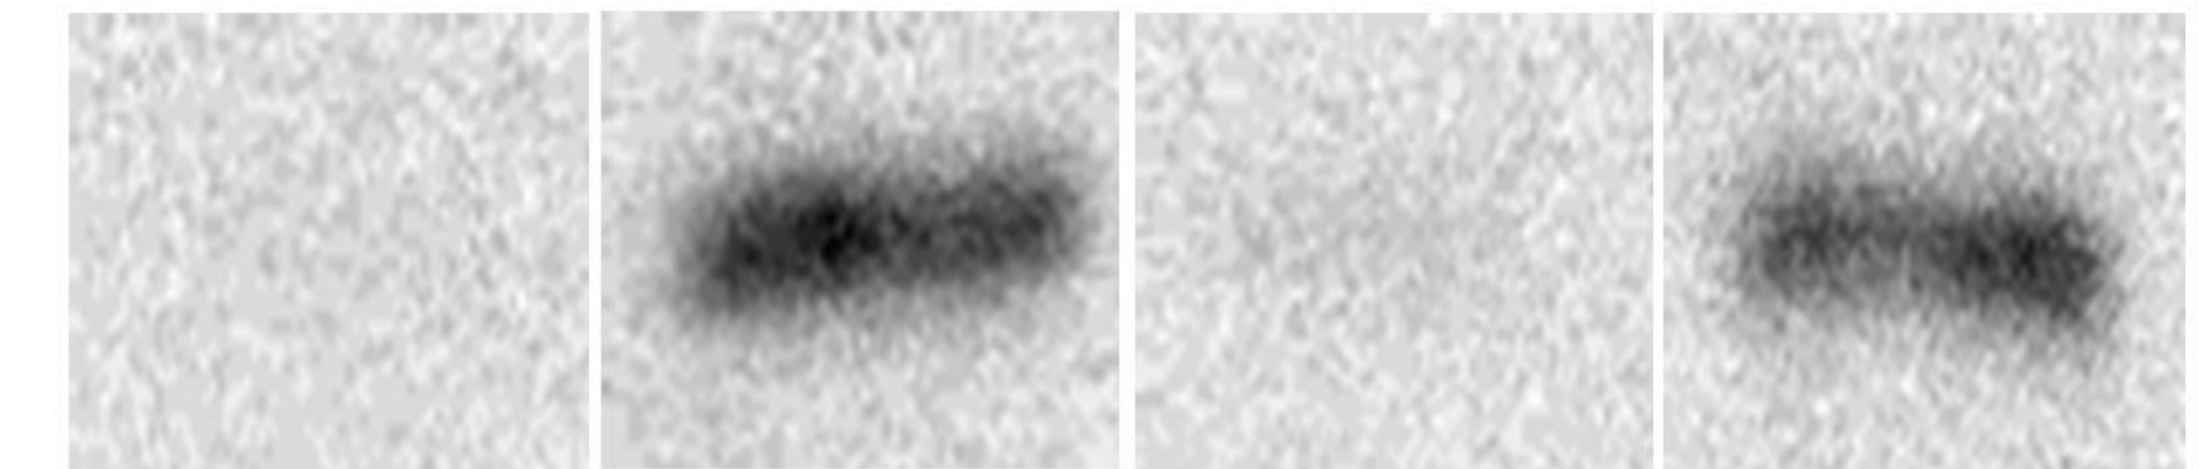

1.00 27.7 1.12 19.3

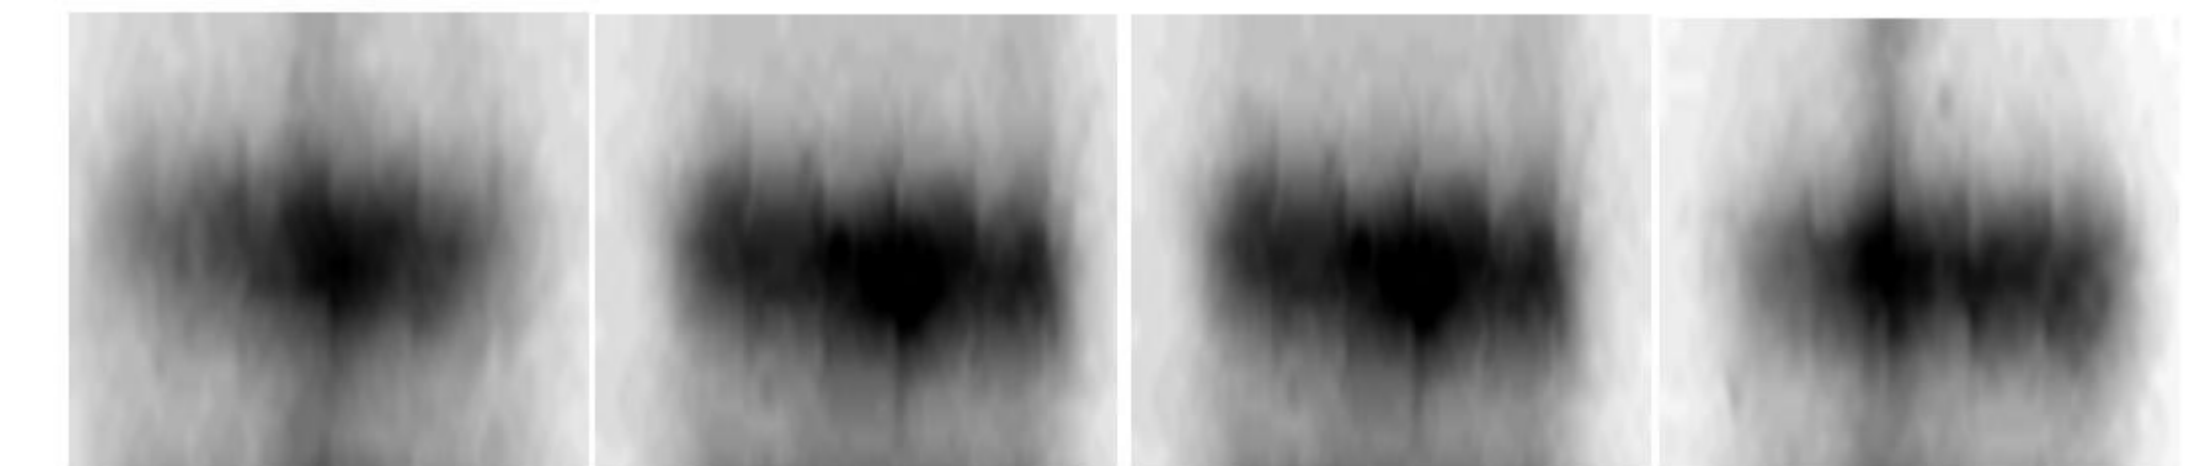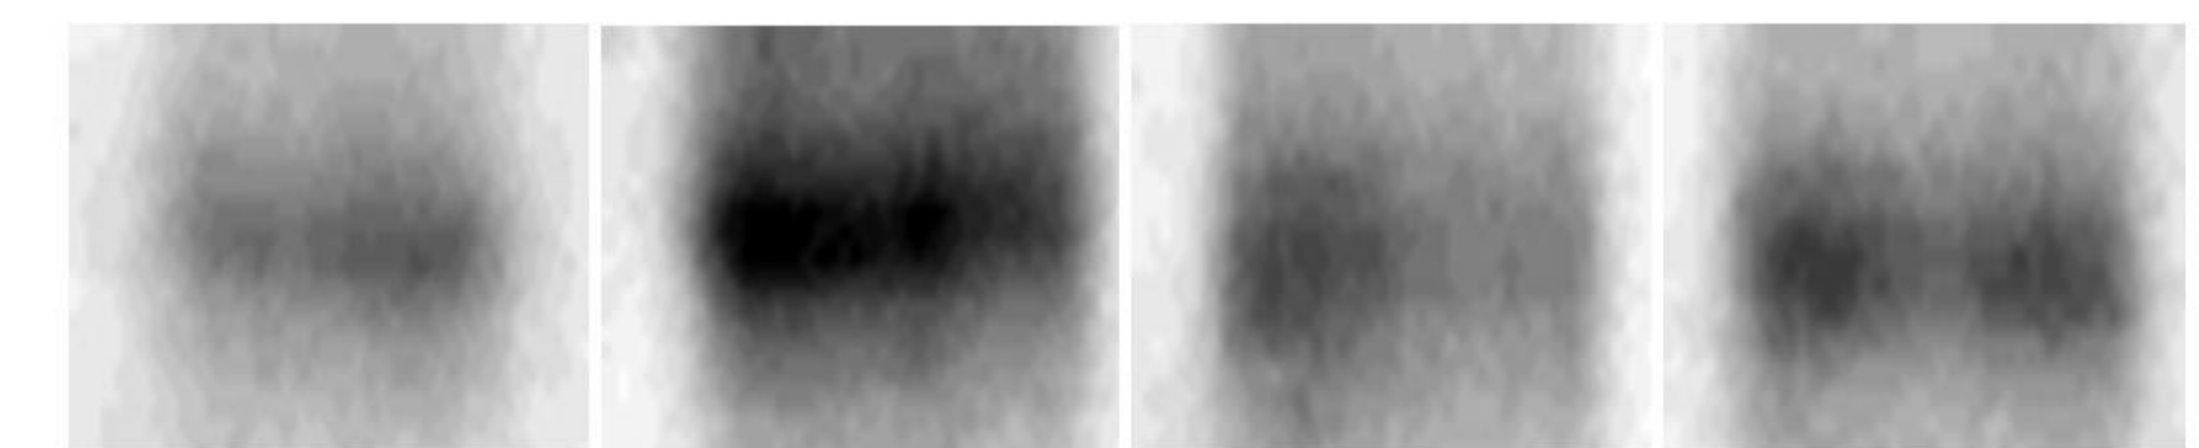

1.00 2.91 1.23 1.18

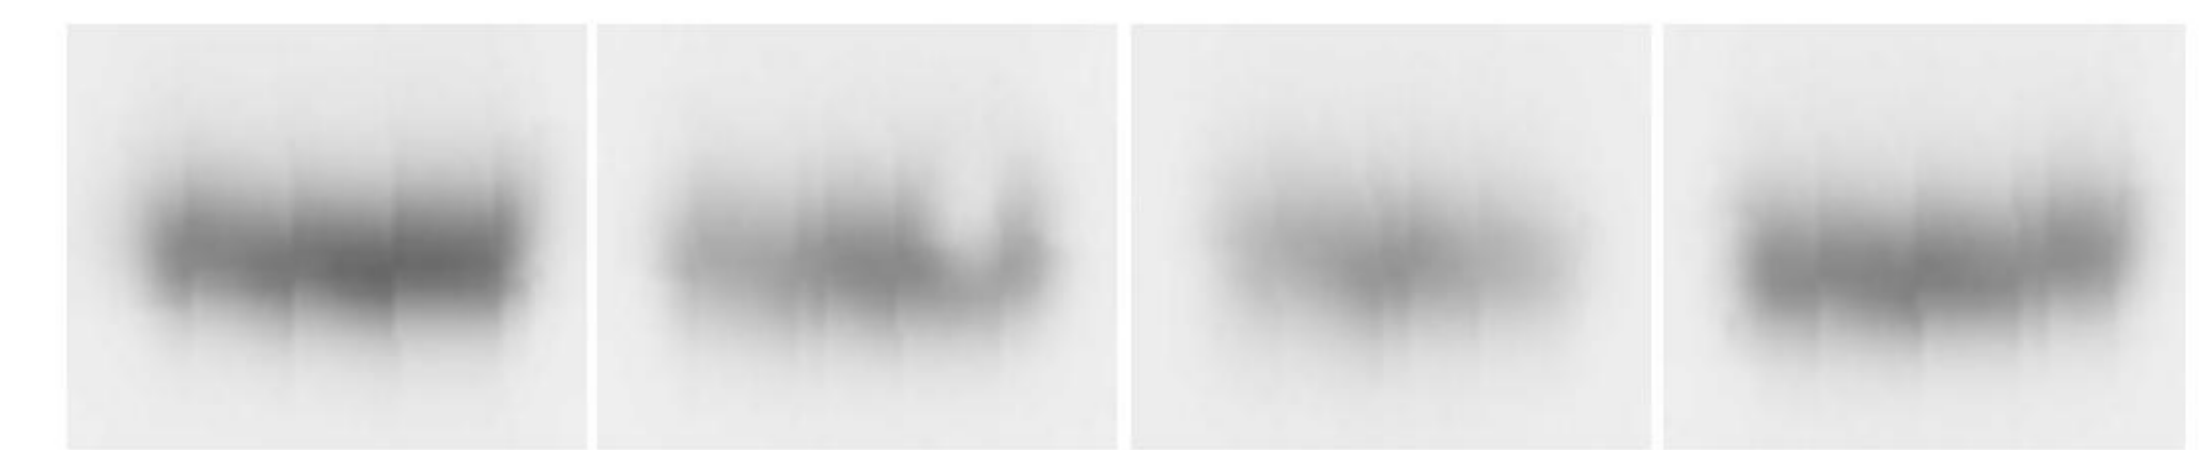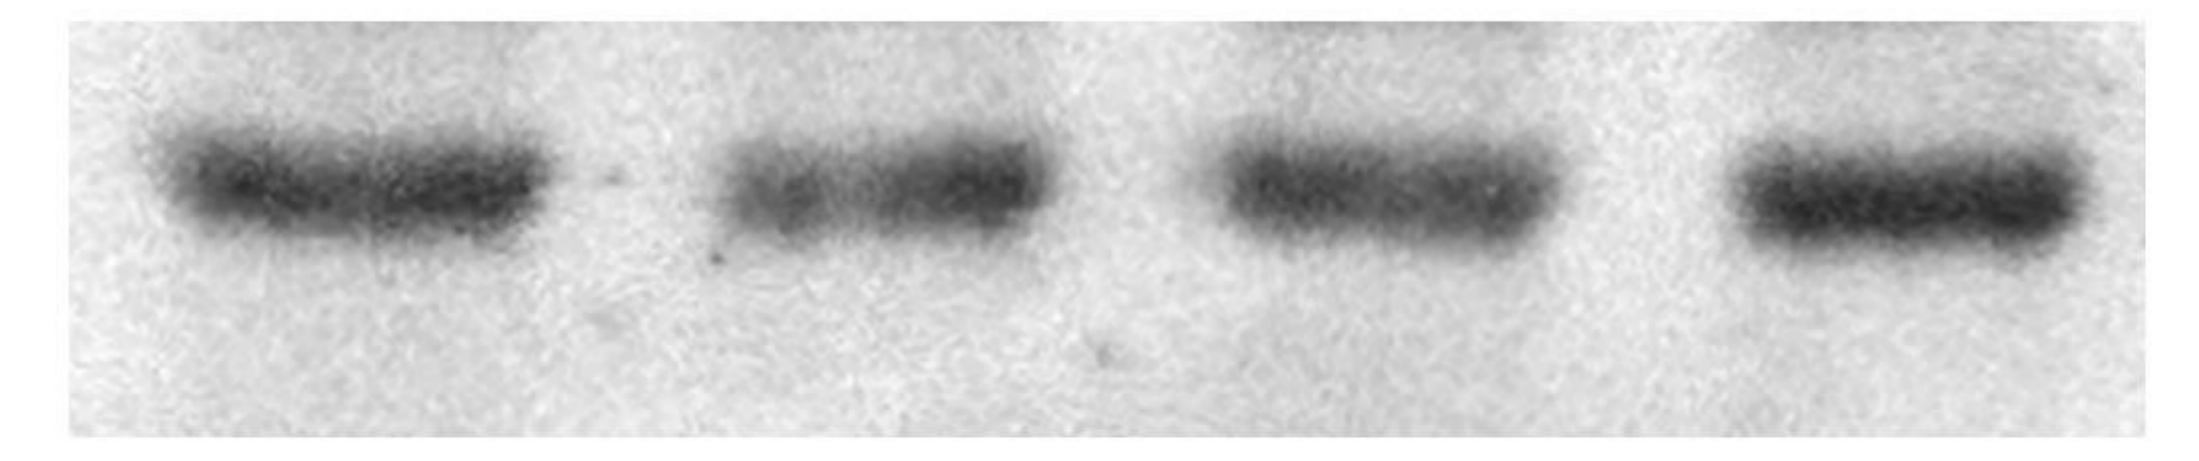

- + - +

- - + +

Supplement: MOESM2 [file 9519692]
